# Supplementary material for: An Electronic Clinical Decision Support Tool to Assist Primary Care Providers in Cardiovascular Disease Risk Management: Development and Mixed Methods Evaluation
Source: PubMed Central journal article supplement (PMC2802562; doi:10.2196/jmir.1258), 2009-12-17
Supplement: jmir_v11i4e51_app1.pdf [file jmir_v11i4e51_app1.pdf]

# Electronic Decision Support Feasibility Study

## End of consultation questions

Patient ID: |\_|\_|\_|\_|\_|\_|\_|\_|\_|\_|

Sex (F/M): |\_|

We are collecting this information to evaluate the EDS tool and develop it further. This is an untested tool; please use your clinical judgment to manage your patient. Your assistance is appreciated.

**Please note that the questions below apply for this patient only**

|    | Please indicate whether you agree or disagree with the statement below                                                                                                                                                                                                                                                                                                                                                                                                                                                                                                                                                                                                                                                                                                                                                                                                                                                                                                                                                             | Strongly disagree        | Disagree                 | Neutral                  | Agree                    | Strongly agree           | Don't know or not applicable    |                                |
|----|------------------------------------------------------------------------------------------------------------------------------------------------------------------------------------------------------------------------------------------------------------------------------------------------------------------------------------------------------------------------------------------------------------------------------------------------------------------------------------------------------------------------------------------------------------------------------------------------------------------------------------------------------------------------------------------------------------------------------------------------------------------------------------------------------------------------------------------------------------------------------------------------------------------------------------------------------------------------------------------------------------------------------------|--------------------------|--------------------------|--------------------------|--------------------------|--------------------------|---------------------------------|--------------------------------|
| 1. | <p>The EDS printout was easy to understand</p> <p>The <u>screening/ monitoring</u> recommendations were appropriate</p> <p>The <u>treatment recommendations</u> were appropriate</p> <p>For patients already taking BP or cholesterol medicines, the recommendations on meeting targets were appropriate</p>                                                                                                                                                                                                                                                                                                                                                                                                                                                                                                                                                                                                                                                                                                                       | <input type="checkbox"/> | <input type="checkbox"/> | <input type="checkbox"/> | <input type="checkbox"/> | <input type="checkbox"/> | <input type="checkbox"/>        |                                |
| 2. | <p><b>Did you update your clinical records based on the recommendations of the EDS tool?</b><br/><b>If yes, which of the following did you add or update?</b></p> <p><input type="checkbox"/> Family history of cardiovascular disease</p> <p><input type="checkbox"/> Past history of cardiovascular disease</p> <p><input type="checkbox"/> Smoking status</p> <p><input type="checkbox"/> Genetic dyslipidaemia/ Familial Hypercholesterolaemia</p> <p><input type="checkbox"/> Diabetes status</p> <p><input type="checkbox"/> Other cardiovascular disease related information (please specify):</p>                                                                                                                                                                                                                                                                                                                                                                                                                          |                          |                          |                          |                          |                          | Yes<br><input type="checkbox"/> | No<br><input type="checkbox"/> |
| 3. | <p><b>Did you order or perform any of the following for your patient in this consultation?</b><br/><b>If yes, please tick as many as apply.</b></p> <p><input type="checkbox"/> Blood pressure                      <input type="checkbox"/> Total cholesterol                      <input type="checkbox"/> Fasting Blood glucose/GTT</p> <p><input type="checkbox"/> Height &amp; weight                      <input type="checkbox"/> HDL                      <input type="checkbox"/> Serum creatinine/ eGFR</p> <p><input type="checkbox"/> Waist circumference                      <input type="checkbox"/> LDL                      <input type="checkbox"/> Urinary Albumin Creatinine Ratio</p> <p><input type="checkbox"/> Urinalysis                      <input type="checkbox"/> Triglycerides                      <input type="checkbox"/> HbA1c</p> <p><input type="checkbox"/> ECG                      <input type="checkbox"/> Electrolytes</p> <p><input type="checkbox"/> Other tests (please specify):</p> |                          |                          |                          |                          |                          | Yes<br><input type="checkbox"/> | No<br><input type="checkbox"/> |
| 4. | <p><b>Did you change the treatment plan for your patient?</b><br/><b>If yes, which of the following did you change or add?</b></p> <p><input type="checkbox"/> Blood pressure lowering therapy</p> <p><input type="checkbox"/> Blood glucose lowering therapy</p> <p><input type="checkbox"/> Lipid lowering therapy</p> <p><input type="checkbox"/> Anti-platelet therapy (aspirin, clopidogrel, dipyrimadole etc.)</p> <p><input type="checkbox"/> Lifestyle modification advice (either Smoking, Nutritional, Alcohol or Physical Activity advice)</p> <p><input type="checkbox"/> Other treatments (please specify)</p>                                                                                                                                                                                                                                                                                                                                                                                                        |                          |                          |                          |                          |                          | Yes<br><input type="checkbox"/> | No<br><input type="checkbox"/> |
